# Supplementary material
Source: HighWire-hosted journal article supplement (doi:10.1101/rna.057513.116)
Supplement: Supplemental_Table_S2.xlsx [file Supplemental_Table_S2.xlsx]

## Sheet: Protein ID
Accession	Gene Symbol	Description	Σ# Peptides Mock - Rep 1	Σ# PSMs Mock - Rep 1	Σ# Peptides Mock - Rep 2	Σ# PSMs Mock - Rep 2	Σ# Peptides Mock - Rep 3	Σ# PSMs Mock - Rep 3	Σ# Peptides A1 - Rep 1	Σ# PSMs A1 - Rep 1	Σ# Peptides A1 - Rep 2	Σ# PSMs A1 - Rep 2	Σ# Peptides A1 - Rep 3	Σ# PSMs A1 - Rep 3	Σ# Peptides G - Rep 1	Σ# PSMs G - Rep 1	Σ# Peptides G - Rep 2	Σ# PSMs G - Rep 2	Σ# Peptides G - Rep 3	Σ# PSMs G - Rep 3	Σ# Peptides dlet - Rep 1	Σ# PSMs dlet - Rep 1	Σ# Peptides dlet - Rep 2	Σ# PSMs dlet - Rep 2	Σ# Peptides dlet - Rep 3	Σ# PSMs dlet - Rep 3	A1 SAINTexpress vs Mock	A1 SAINTexpress vs dlet	G SAINTexpress vs Mock	G SAINTexpress vs dlet
316659409	ACTB; ACTG	actin, cytoplasmic 1; actin, cytoplasmic 2 [Homo sapiens]			4	7	6	12	4	11	9	27	6	11			7	17			5	10	2	6	2	7	0	0	0	0
63055057	ACTBL2	beta-actin-like protein 2 [Homo sapiens]									3	6							2	5							0.33	0.33	0.39	0.33
70167032	ADAR	double-stranded RNA-specific adenosine deaminase [Homo sapiens]							4	4	5	7															0.67	0.67
34577112	ALDOA	fructose-bisphosphate aldolase A [Homo sapiens]									5	8															0.33	0.33
256222280	ANKRD36	ankyrin repeat domain-containing protein 36A [Homo sapiens]											2	2													0.33	0.33
50845386	ANXA2	annexin A2 [Homo sapiens]					4	6			5	10	3	10					4	9					4	7	0.63	0.6	0.3	0.26
530403617	APEX1	DNA-(apurinic or apyrimidinic site) lyase [Homo sapiens]									2	4															0.33	0.33
20127454	ATIC	bifunctional purine biosynthesis protein PURH [Homo sapiens]									2	2															0.33	0.33
50345984	ATP5A1	ATP synthase subunit alpha, mitochondrial [Homo sapiens]					2	4			2	2									5	8	5	9			0.09	0	0	0
32189394	ATP5B	ATP synthase subunit beta, mitochondrial precursor [Homo sapiens]					3	4	7	18	4	7	5	9	2	4	2	2	4	6	11	19	5	10	5	9	0.97	0	0.6	0
27262651	ATXN2L	ataxin-2-like protein [Homo sapiens]					2	4
20070130	BRF3	transcription factor BTF3 [Homo sapiens]							2	4																	0.33	0.33
20070130	BTF3	transcription factor BTF3 [Homo sapiens]									3	9	2	2			2	4							2	6	0.66	0.3	0.42	0
56847620	BTF3L4	transcription factor BTF3 homolog 4 isoform 1 [Homo sapiens]									2	4	2	2													0.93	0.92
554790405	C11orf48	uncharacterized protein LOC102288414 [Homo sapiens]									2	4					2	4									0.35	0.37	0.33	0.4
4502491	C1QBP	complement component 1 Q subcomponent-binding protein, mitochondrial precursor [Homo sapiens]			2	6	4	25					2	6							2	5			2	2	0	0.16	0	0
530385066	C7orf50	uncharacterized protein C7orf50 [Homo sapiens]							6	18	7	15	3	3	4	12	7	19	3	6	2	2					1	0.94	1	0.99
58218968	CALM3	calmodulin [Homo sapiens]																							2	3
42734503	CAPRIN1	caprin-1 [Homo sapiens]					4	7															2	4			0	0	0	0
5453597	CAPZA1	F-actin-capping protein subunit alpha-1 [Homo sapiens]					3	6
4826659	CAPZB	F-actin-capping protein subunit beta [Homo sapiens]																							3	4
4502599	CBR1	carbonyl reductase [NADPH] 1 isoform 1 [Homo sapiens]					2	4	4	9	5	7	3	6	3	4	6	10			3	10	5	9	3	5	0.93	0	0.53	0
24307939	CCT5	T-complex protein 1 subunit epsilon [Homo sapiens]									2	2															0.33	0.33
6912246	CD3EAP	DNA-directed RNA polymerase I subunit RPA34 [Homo sapiens]							6	11	4	7															0.67	0.67
5031635	CFL1	cofilin-1 [Homo sapiens]			2	4	4	13			3	6	2	5					2	2					2	4	0	0.57	0	0.04
578832963	CIRBP	cold-inducible RNA-binding protein [Homo sapiens]									2	5															0.46	0.46
187608750	CNBP	cellular nucleic acid-binding protein isoform 6 [Homo sapiens]							3	10	6	10					2	4			6	12	3	5			0.67	0	0.41	0
4502985	COX6B1	cytochrome c oxidase subunit 6B1 [Homo sapiens]													2	3													0.33	0.33
224586882	CSDAP1	Y-box-binding protein 3 isoform a [Homo sapiens]					8	16	10	43	12	42	8	22	12	37	15	46	7	37	4	11	4	8			0.97	1	0.79	0.99
338968934	CSDE1	cold shock domain-containing protein E1 [Homo sapiens]											3	6													0.33	0.33
578835362	CSNK2A1	casein kinase II subunit alpha [Homo sapiens]							6	12	5	10	2	4	4	10	2	4									1	1	0.66	0.66
4503097	CSNK2A2	casein kinase II subunit alpha' [Homo sapiens]									3	6															0.41	0.33
32306539	CXorf26	protein PBDC1 [Homo sapiens]											3	5													0.44	0.45
148529014	DDB1	DNA damage-binding protein 1 [Homo sapiens]																							2	2
38201710	DDX17	probable ATP-dependent RNA helicase DDX17 [Homo sapiens]					2	2			4	7					4	5	2	4							0.33	0.33	0.6	0.67
530411696	DDX5	probable ATP-dependent RNA helicase DDX5 [Homo sapiens]							6	10	9	15			2	4	2	3									0.67	0.67	0.66	0.65
100913206	DHX9	ATP-dependent RNA helicase A [Homo sapiens]							44	163	42	125	25	64	39	91	36	106	26	67	19	51	14	32	14	31	1	0.9	1	0
578803217	DPY30	protein dpy-30 homolog [Homo sapiens]															2	5											0.4	0.39
347543829	DPYSL2	dihydropyrimidinase-related protein 2 [Homo sapiens]					3	5					3	6					3	5					3	3	0.28	0.31	0.24	0.27
4503379	DPYSL3	dihydropyrimidinase-related protein 3 [Homo sapiens]					2	2
239788462	DUS3L	tRNA-dihydrouridine(47) synthase [NAD(P)(+)]-like isoform 1 [Homo sapiens]							2	2	2	4					2	2									0.66	0.66	0.33	0.32
83267866	DYNLL1	dynein light chain 1, cytoplasmic [Homo sapiens]					2	4
4503471	EEF1A1	elongation factor 1-alpha 1 [Homo sapiens]	2	2	3	5	6	23	7	43	10	40	7	30	4	15	7	16	7	23	5	16	4	17	8	36	0.71	0	0	0
4503477	EEF1B2	elongation factor 1-beta [Homo sapiens]			3	9	3	15	3	9	2	5	3	7	2	6	3	12	3	11	3	6	2	6	3	9	0	0	0	0
304555581	EEF1D	elongation factor 1-delta [Homo sapiens]					5	8					2	5											3	3	0.07	0.45	0	0
4503481	EEF1G	elongation factor 1-gamma [Homo sapiens]	3	6	3	6	6	18	5	13	7	18	3	6	3	8	6	16	2	6	7	21	3	11	3	11	0	0.02	0	0
4503483	EEF2	elongation factor 2 [Homo sapiens]			3	3	17	43			11	20	14	30					8	16	2	2	2	2	17	35	0	0	0	0
4503499	EIF1AX	eukaryotic translation initiation factor 1A, X-chromosomal [Homo sapiens]									3	5															0.46	0.47
208431829	EIF2AK2	interferon-induced, double-stranded RNA-activated protein kinase [Homo sapiens]							2	6	3	5			2	2											0.67	0.67	0.33	0.32
4503523	EIF3D	eukaryotic translation initiation factor 3 subunit D [Homo sapiens]											2	4													0.33	0.33
4503513	EIF3I	eukaryotic translation initiation factor 3 subunit I [Homo sapiens]					4	5
4503529	EIF4A1/EIF4A2	eukaryotic initiation factor 4A-I; eukaryotic initiation factor 4A-II [Homo sapiens]									2	4															0.33	0.33
50053795	EIF4B	eukaryotic translation initiation factor 4B [Homo sapiens]					3	5																	2	2	0	0	0	0
219555707	EIF5A	eukaryotic translation initiation factor 5A-1 [Homo sapiens]																							3	3
392494084	EIF6	eukaryotic translation initiation factor 6 [Homo sapiens]					3	5					2	4					2	2			2	4	2	4	0.2	0.01	0.03	0
38201714	ELAVL1	ELAV-like protein 1 [Homo sapiens]									4	6									2	4	2	4			0.46	0.28
4503571	ENO1	alpha-enolase [Homo sapiens]									12	22															0.33	0.33
4758274	EPB41	protein 4.1 [Homo sapiens]							2	2	2	4															0.66	0.66
126722894	FAM195B	protein FAM195B [Homo sapiens]					2	8					3	4											2	3	0.03	0.27	0	0
4758340	FARSA	phenylalanine--tRNA ligase alpha subunit [Homo sapiens]									2	2	2	2													0.66	0.65
4503659	FAU	ubiquitin-like protein fubi and ribosomal protein S30 precursor [Homo sapiens]							2	3					2	7	2	7									0.33	0.33	0.66	0.66
4503729	FKBP4	peptidyl-prolyl cis-trans isomerase FKBP4 [Homo sapiens]									3	4															0.39	0.38
116063573	FLNA	filamin-A [Homo sapiens]									3	4															0.33	0.33
4507115	FSCN1	fascin [Homo sapiens]									2	2															0.33	0.33
4826734	FUS	RNA-binding protein FUS [Homo sapiens]																							2	2
61835172	FXR1	fragile X mental retardation syndrome-related protein 1 [Homo sapiens]							2	4																	0.33	0.33
259013556	FXR2	fragile X mental retardation syndrome-related protein 2 [Homo sapiens]									2	4															0.33	0.36
578810779	G3BP1	ras GTPase-activating protein-binding protein 1 [Homo sapiens]					3	3			4	5	2	2													0.47	0.66
499589768	GANAB	neutral alpha-glucosidase AB [Homo sapiens]									3	3															0.33	0.33
378404908	GAPDH	glyceraldehyde-3-phosphate dehydrogenase [Homo sapiens]					6	18	3	6	12	34	6	12	2	2	8	22	5	12	4	11	2	3	6	14	0.33	0.53	0.01	0
5174447	GNB2L1	guanine nucleotide-binding protein subunit beta-2-like 1 [Homo sapiens]					2	2			2	2	2	4			2	4			8	13	3	5	6	8	0.54	0.02	0.21	0
45643127	GNL3	guanine nucleotide-binding protein-like 3 [Homo sapiens]							10	22	9	16					2	4									0.67	0.67	0.33	0.32
149193321	GRSF1	G-rich sequence factor 1 [Homo sapiens]							15	66	20	72	12	33	7	16	12	29	5	12	7	17	5	14	3	7	1	0.69	1	0
237820620	GRWD1	glutamate-rich WD repeat-containing protein 1 [Homo sapiens]			3	5	2	3	3	6	5	10					2	2	2	2	2	2			2	6	0.41	0.38	0	0
P08515	GST	RecName: Glutathione S-transferase fusion domain; Full=GST - [sp|P085154|GST_SCHJA]	5	16	14	45	13	53	13	107	14	63	11	65	13	56	17	88	9	47	22	132	12	91	19	170	0	0	0	0
4504183	GSTP1	glutathione S-transferase P [Homo sapiens]	2	2	6	14	10	24	8	23	3	7	9	25	3	9	9	25	9	23	7	24	4	11	11	46	0	0	0	0
530381903	HMGA1	high mobility group AT-hook 1 [Homo sapiens]							2	8			2	4			2	10	2	6	2	6	2	3			0.67	0.19	0.93	0.02
530402312	HMGB1	high mobility group protein B1 [Homo sapiens]									2	2															0.33	0.33
21700763	HN1L	hematological and neurological expressed 1-like protein [Homo sapiens]																							3	8
5803036	HNRNPA0	heterogeneous nuclear ribonucleoprotein A0 [Homo sapiens]							9	35	9	34	7	24	2	4	4	9	2	4			3	7			1	1	1	0.08
4504445	HNRNPA1	heterogeneous nuclear ribonucleoprotein A1 isoform a [Homo sapiens]			3	8	3	7	16	80	21	80	13	47	4	13	7	20	3	11	5	10	8	16	2	9	1	1	0.1	0
4504447	HNRNPA2B1	heterogeneous nuclear ribonucleoproteins A2/B1 [Homo sapiens]			7	11	4	8	14	54	14	53	9	26	8	16	13	31	3	8	6	10	7	15			0.99	0.81	0.04	0
578803915	HNRNPA3	heterogeneous nuclear ribonucleoprotein A3 [Homo sapiens]							10	24	15	27	2	3	2	2	3	4									1	1	0.66	0.65
55956921	HNRNPAB	heterogeneous nuclear ribonucleoprotein A/B [Homo sapiens]					2	2	10	29	10	22	8	20	4	7	8	18	2	2	2	4	3	3			1	1	0.87	0.43
14110414	HNRNPD	heterogeneous nuclear ribonucleoprotein D0 [Homo sapiens]							8	23	12	29	6	12	2	6	6	16			3	5	3	5	2	2	1	0.97	0.67	0
332801090	HNRNPDL	heterogeneous nuclear ribonucleoprotein D-like [Homo sapiens]																					2	2
4826760	HNRNPF	heterogeneous nuclear ribonucleoprotein F [Homo sapiens]							4	14	9	17															0.67	0.67
381342476	HNRNPH1	heterogeneous nuclear ribonucleoprotein H [Homo sapiens]					4	11	12	51	14	41	6	14	3	5	5	11	3	5	5	8	5	13	5	12	0.96	0.67	0.01	0
9624998	HNRNPH2	heterogeneous nuclear ribonucleoprotein H2 [Homo sapiens]									9	25															0.33	0.33
14141159	HNRNPH3	heterogeneous nuclear ribonucleoprotein H3 [Homo sapiens]							6	11	9	19															0.67	0.67
530391061	HNRNPK	heterogeneous nuclear ribonucleoprotein K [Homo sapiens]					8	14			3	7	7	11					2	2					6	14	0.07	0.06	0	0
52632383	HNRNPL	heterogeneous nuclear ribonucleoprotein L [Homo sapiens]							2	2	4	6															0.66	0.66
157412270	HNRNPM	heterogeneous nuclear ribonucleoprotein M [Homo sapiens]							7	15	5	7					4	4			5	10					0.67	0.37	0.39	0
156151392	HNRNPR	heterogeneous nuclear ribonucleoprotein R [Homo sapiens]							3	12	4	10	4	8													1	1
14141161	HNRNPU	heterogeneous nuclear ribonucleoprotein U [Homo sapiens]			2	4			14	48	17	47	3	9	7	14	13	32	2	7	5	15	5	12	2	5	0.99	0.67	0.96	0
21536326	HNRNPUL1	heterogeneous nuclear ribonucleoprotein U-like protein 1 [Homo sapiens]							7	11	6	11			2	2	3	6			3	4	3	3			0.67	0.65	0.66	0
118601081	HNRNPUL2	heterogeneous nuclear ribonucleoprotein U-like protein 2 [Homo sapiens]									2	2															0.33	0.33
83715985	HSD17B10	3-hydroxyacyl-CoA dehydrogenase type-2 [Homo sapiens]									2	7	3	3					2	2					2	2	0.96	0.87	0.33	0.33
4504505	HSD17B4	peroxisomal multifunctional enzyme type 2 [Homo sapiens]									2	2															0.33	0.33
431822406	HSP90AB1	heat shock protein HSP 90-beta [Homo sapiens]									2	4															0.33	0.33
16507237	HSPA5	78 kDa glucose-regulated protein precursor [Homo sapiens]	4	5	10	19	8	19	10	29	16	36	9	23	9	16	14	34	9	25	14	32	14	28	15	41	0	0.01	0	0
578822169	HSPA8	heat shock cognate 71 kDa protein [Homo sapiens]	5	9	12	24	20	51	17	54	22	51	17	46	13	30	16	40	16	43	18	50	16	40	19	76	0	0	0	0
24234688	HSPA9	stress-70 protein, mitochondrial precursor [Homo sapiens]									5	11					2	2			3	6					0.43	0.46	0.33	0.03
4504517	HSPB1	heat shock protein beta-1 [Homo sapiens]			3	4					4	6															0.3	0.47
530370277	HSPD1	60 kDa heat shock protein, mitochondrial [Homo sapiens]					3	8			8	16	3	6			2	6							3	6	0.46	0.56	0	0
4504523	HSPE1	10 kDa heat shock protein, mitochondrial [Homo sapiens]							2	8	7	16					2	5	2	4	2	4			2	4	0.67	0.56	0.89	0.01
56237027	IGF2BP1	insulin-like growth factor 2 mRNA-binding protein 1 [Homo sapiens]							28	131	31	119	21	68	18	55	23	81	14	36	2	4					1	1	1	1
56118219	IGF2BP2	insulin-like growth factor 2 mRNA-binding protein 2 [Homo sapiens]							14	49	12	38	6	22	4	13	5	15									1	1	0.67	0.67
30795212	IGF2BP3	insulin-like growth factor 2 mRNA-binding protein 3 [Homo sapiens]							14	61	17	52	5	23	6	15	5	18									1	1	0.67	0.67
24234747	ILF2	interleukin enhancer-binding factor 2 [Homo sapiens]			3	7	3	8	15	94	16	64	13	47	16	50	19	75	11	38	14	47	9	31	8	30	1	0	0.97	0
24234750	ILF3	interleukin enhancer-binding factor 3 [Homo sapiens]			3	6	4	7	44	260	49	192	26	79	43	131	46	202	23	81	40	122	30	89	25	71	1	0	1	0
154355000	KHSRP	far upstream element-binding protein 2 [Homo sapiens]					6	14			9	12			4	6							6	14			0.12	0.1	0	0
37595750	LBR	lamin-B receptor [Homo sapiens]									2	6															0.38	0.4
291575128	LDHB	L-lactate dehydrogenase B chain [Homo sapiens]									4	9					2	4									0.33	0.33	0.39	0.32
578799767	LIN28A	protein lin-28 homolog A [Homo sapiens]	11	33	17	73	13	55	16	138	18	114	14	110	18	110	18	139	12	98	11	65	10	42	9	59	0	0	0	0
51972214	LIN28B	protein lin-28 homolog B [Homo sapiens]							7	21	8	23			5	11	5	11									0.67	0.67	0.67	0.67
126012573	LRP2	low-density lipoprotein receptor-related protein 2 precursor [Homo sapiens]															2	2											0.33	0.32
197276600	MAP4	microtubule-associated protein 4 [Homo sapiens]					8	17					5	7					2	5					2	6	0	0.27	0	0.13
21735621	MDH2	malate dehydrogenase, mitochondrial [Homo sapiens]									8	12					2	4									0.33	0.33	0.37	0.32
222352111	MKI67IP	MKI67 FHA domain-interacting nucleolar phosphoprotein [Homo sapiens]									2	2															0.33	0.33
40068479	MRM1	rRNA methyltransferase 1, mitochondrial precursor [Homo sapiens]									2	2															0.33	0.33
27436901	MRPL12	39S ribosomal protein L12, mitochondrial [Homo sapiens]							2	6	3	7															0.67	0.67
333033787	NACA	nascent polypeptide-associated complex subunit alpha [Homo sapiens]					2	2	3	5	4	5					2	6					2	4	6	10	0.64	0	0.21	0
55956788	NCL	nucleolin [Homo sapiens]	8	13	14	37	17	33	72	513	60	448	59	314	61	378	69	446	61	394	30	93	29	84	28	98	1	1	0.67	0.67
224028244	NONO	non-POU domain-containing octamer-binding protein [Homo sapiens]							2	2	9	16	3	8			3	5	2	2							1	0.99	0.78	0.65
40353734	NPM1	nucleophosmin [Homo sapiens]			4	10	2	4	5	13	7	16			5	11	6	15			5	9	3	6			0.43	0.31	0.04	0.01
301336155	NSUN2	tRNA (cytosine(34)-C(5))-methyltransferase [Homo sapiens]							21	52	24	60			12	22	15	33			12	20	4	6			0.67	0.66	0.67	0.01
14150100	NTPCR	cancer-related nucleoside-triphosphatase [Homo sapiens]							2	6																	0.33	0.33
124494254	PA2G4	proliferation-associated protein 2G4 [Homo sapiens]					2	2			2	2	3	6			2	2	2	6	2	2					0.56	0.61	0.54	0.89
530388906	PABPC1	polyadenylate-binding protein 1 [Homo sapiens]					3	7	5	10			3	7			3	8	2	4	3	3			4	11	0.56	0.28	0.06	0
208431836	PABPC4	polyadenylate-binding protein 4 [Homo sapiens]							4	8																	0.33	0.33
4758876	PABPN1	polyadenylate-binding protein 2 [Homo sapiens]																					3	10	3	6
193083114	PCBP2	poly(rC)-binding protein 2 [Homo sapiens]									3	5	2	2													0.66	0.66
222352151	PCDP1	poly(rC)-binding protein 1 [Homo sapiens]					4	9			5	9	3	4									2	2			0.25	0.63	0	0
21361657	PDIA3	protein disulfide-isomerase A3 precursor [Homo sapiens]					2	2			6	12															0.33	0.33
544186040	PDIA6	protein disulfide-isomerase A6 [Homo sapiens]									3	5															0.33	0.33
4826898	PFN1	profilin-1 [Homo sapiens]									4	10							2	2							0.33	0.33	0.36	0.32
4505763	PGK1	phosphoglycerate kinase 1 [Homo sapiens]									4	7															0.47	0.43
5729875	PGRMC1	membrane-associated progesterone receptor component 1 isoform 1 [Homo sapiens]																			2	2
530405979	PKM	pyruvate kinase PKM [Homo sapiens]			2	4					8	14															0.33	0.33
42560246	POLR1C	DNA-directed RNA polymerases I and III subunit RPAC1 [Homo sapiens]															2	2											0.4	0.44
4505939	POLR2A	DNA-directed RNA polymerase II subunit RPB1 [Homo sapiens]															2	2											0.33	0.32
153791431	POP7	ribonuclease P protein subunit p20 [Homo sapiens]									2	2															0.37	0.42
10863927	PPIA	peptidyl-prolyl cis-trans isomerase A [Homo sapiens]			2	2	8	21	4	7	8	22	8	32			6	14	9	31	4	5	2	5	9	39	0.41	0	0.3	0
5454154	PPIH	peptidyl-prolyl cis-trans isomerase H [Homo sapiens]									2	2									2	2					0.33	0.22
269784739	PQBP1	polyglutamine-binding protein 1 [Homo sapiens]									2	2															0.33	0.33
4505591	PRDX1	peroxiredoxin-1 [Homo sapiens]			3	5	10	39			9	20	6	19	2	2	3	7	4	15	3	6			10	32	0	0	0	0
32189392	PRDX2	peroxiredoxin-2 [Homo sapiens]											2	2											3	12	0.33	0
213417919	PRKRA	interferon-inducible double-stranded RNA-dependent protein kinase activator A [Homo sapiens]							4	9	7	13					2	3									0.67	0.67	0.35	0.45
23110944	PSMA6	proteasome subunit alpha type-6 [Homo sapiens]					2	2
402794208	PUF60	poly(U)-binding-splicing factor PUF60 [Homo sapiens]							2	4																	0.33	0.33
5032007	PURA	transcriptional activator protein Pur-alpha [Homo sapiens]							3	5	3	5					3	6									0.67	0.67	0.45	0.33
15147219	PURB	transcriptional activator protein Pur-beta [Homo sapiens]							3	7	3	6	2	2			3	6									1	0.99	0.43	0.33
70166599	PUS1	tRNA pseudouridine synthase A, mitochondrial [Homo sapiens]							3	6	3	6					5	9									0.67	0.67	0.46	0.33
5453555	RAN	GTP-binding nuclear protein Ran [Homo sapiens]									4	7															0.48	0.49
5454064	RBM14	RNA-binding protein 14 isoform 1 [Homo sapiens]									4	7															0.33	0.33
311771545	RBM14-RBM4	RBM14-RBM4 protein isoform 1 [Homo sapiens]							2	6											2	2					0.33	0.33
93277122	RBM4	RNA-binding protein 4 isoform 1 [Homo sapiens]																					2	4
209969703	RCC2	protein RCC2 [Homo sapiens]					5	10					5	11					2	2					3	3	0.27	0.33	0	0.1
4506613	RPL22	60S ribosomal protein L22 proprotein [Homo sapiens]							2	6	4	8	2	5	2	7	4	7	2	6	2	4					1	0.9	1	0.73
153791384	RPL22L1	60S ribosomal protein L22-like 1 [Homo sapiens]							2	3	3	9					3	6									0.67	0.67	0.44	0.41
4506631	RPL30	60S ribosomal protein L30 [Homo sapiens]															2	6	2	4									0.9	0.65
78214522	RPL38	60S ribosomal protein L38 [Homo sapiens]									2	4					2	4									0.33	0.33	0.4	0.32
4506669	RPLP1	60S acidic ribosomal protein P1 isoform 1 [Homo sapiens]					2	2	2	4	2	2							2	6	2	5					0.54	0.21	0.37	0.23
4506671	RPLP2	60S acidic ribosomal protein P2 [Homo sapiens]					4	7	3	6			3	5			3	7			2	4	2	4	4	7	0.33	0	0.01	0
14277700	RPS12	40S ribosomal protein S12 [Homo sapiens]					7	15					3	4											4	11	0	0	0	0
5032051	RPS14	40S ribosomal protein S14 [Homo sapiens]									4	5															0.33	0.33
4506693	RPS17	40S ribosomal protein S17 [Homo sapiens]							3	8	3	8			2	5	3	6									0.67	0.67	0.67	0.66
4506711	RPS27; RPS27L	40S ribosomal protein S27; 40S ribosomal protein S27-like [Homo sapiens]							2	2
4506715	RPS28	40S ribosomal protein S28 [Homo sapiens]															2	4											0.4	0.32
4506723	RPS3A	40S ribosomal protein S3a isoform 1 [Homo sapiens]							4	9	3	5					6	11									0.67	0.67	0.48	0.33
4506741	RPS7	40S ribosomal protein S7 [Homo sapiens]							4	12	5	13			4	15	7	22	2	3							0.67	0.67	1	1
59859885	RPSA	40S ribosomal protein SA [Homo sapiens]			2	2	3	5	2	5			3	4			3	9			3	7			2	2	0.14	0.02	0.01	0
4506589	RTCA	RNA 3'-terminal phosphate cyclase [Homo sapiens]									2	4															0.33	0.33
8923421	SARS2	serine--tRNA ligase, mitochondrial [Homo sapiens]													2	2	4	10											0.66	0.65
7661952	SART3	squamous cell carcinoma antigen recognized by T-cells 3 [Homo sapiens]							6	10	14	23															0.67	0.67
578821828	SERPINH1	serpin H1 [Homo sapiens]					2	4			5	12	4	7			2	4	3	6					4	9	0.64	0.41	0.37	0.03
530363140	SFPQ	splicing factor, proline- and glutamine-rich [Homo sapiens]									7	14	3	6			2	2									0.67	0.67	0.33	0.32
4759156	SNRPA	U1 small nuclear ribonucleoprotein A [Homo sapiens]							3	9	2	3															0.67	0.67
4759160	SNRPD3	small nuclear ribonucleoprotein Sm D3 [Homo sapiens]							2	4	2	4	2	4													1	1
609876591	SON	protein SON [Homo sapiens]							4	11	3	8			4	6	4	12			5	15	2	2			0.67	0	0.67	0
28195386	SOX2	transcription factor SOX-2 [Homo sapiens]							3	9	3	8					2	6									0.67	0.67	0.39	0.32
149999611	SRP14	signal recognition particle 14 kDa protein [Homo sapiens]							3	3	4	6	2	2	3	5	4	10	2	3							0.99	0.99	1	1
4507217	SRP9	signal recognition particle 9 kDa protein isoform 2 [Homo sapiens]									4	6															0.47	0.47
5902076	SRSF1	serine/arginine-rich splicing factor 1 [Homo sapiens]							5	19	9	21	2	6	5	10	4	10									1	1	0.67	0.67
47271443	SRSF2	serine/arginine-rich splicing factor 2 [Homo sapiens]							3	9	2	5	2	2			2	6									1	0.99	0.41	0.32
4506901	SRSF3	serine/arginine-rich splicing factor 3 [Homo sapiens]							2	2	2	2															0.66	0.65
4506903	SRSF9	serine/arginine-rich splicing factor 9 [Homo sapiens]							7	14	5	9			3	5	5	8									0.67	0.67	0.67	0.67
530370872	SSB	lupus La protein [Homo sapiens]					2	3	11	40	19	47	11	29	7	19	12	32	6	16	7	11	4	6	5	15	1	0.78	1	0
530418343	STAU1	double-stranded RNA-binding protein Staufen homolog 1 [Homo sapiens]							10	29	8	21	3	9	5	8	10	24	2	4	10	19	5	11	6	12	1	0	1	0
148727341	STRAP	serine-threonine kinase receptor-associated protein [Homo sapiens]					10	26			5	7	6	16			2	4	6	18					9	30	0	0.31	0	0
283806705	STRBP	spermatid perinuclear RNA-binding protein [Homo sapiens]							6	25	9	18			5	13	5	14									0.67	0.67	0.67	0.67
217330646	SUB1	activated RNA polymerase II transcriptional coactivator p15 [Homo sapiens]							3	11	4	13	2	3	2	2	3	4									1	1	0.66	0.65
228008396	SYNCRIP	heterogeneous nuclear ribonucleoprotein Q [Homo sapiens]							4	11	4	8	4	6	2	4	5	13	2	4							1	1	1	1
469608407	TAGLN2	transgelin-2 [Homo sapiens]									6	12															0.48	0.48
57164975	TCOF1	treacle protein [Homo sapiens]							3	7	4	7			6	9	3	4					2	4			0.67	0.61	0.67	0.42
4507401	TFAM	transcription factor A, mitochondrial isoform 1 precursor [Homo sapiens]							2	6	2	6			2	4	3	7									0.67	0.67	0.67	0.66
238776833	THOC4	THO complex subunit 4 [Homo sapiens]							4	9	4	6	2	3	2	4	2	6									1	1	0.66	0.65
4507521	TKT	transketolase [Homo sapiens]					3	6			5	12					3	6	3	5							0.32	0.33	0.22	0.66
4507645	TPI1	triosephosphate isomerase [Homo sapiens]					5	8			12	31					4	8			4	7					0.35	0.5	0.02	0.21
499137520	TPM1; TPM2; TPM3; TPM4	tropomyosin alpha-1/3/4 chain; tropomyosin beta chain [Homo sapiens]									2	2															0	0
5032179	TRIM28	transcription intermediary factor 1-beta [Homo sapiens]	2	2	5	8			13	28	12	24			11	17	11	25			12	22	11	20			0.66	0.06	0.57	0
84993742	TRIM71	E3 ubiquitin-protein ligase TRIM71 [Homo sapiens]							7	15	8	15															0.67	0.67
554506526	TRMT112	tRNA methyltransferase 112 homolog [Homo sapiens]
163792194	TRMT1L	TRMT1-like protein [Homo sapiens]							5	9					9	18	3	3									0.33	0.33	0.67	0.66
527317379	TRMT6	tRNA (adenine(58)-N(1))-methyltransferase non-catalytic subunit TRM6 [Homo sapiens]							2	2							6	10									0.33	0.33	0.46	0.33
123173772	TRMT61A	tRNA (adenine(58)-N(1))-methyltransferase catalytic subunit TRMT61A [Homo sapiens]							2	8	4	6			2	4	3	10									0.67	0.67	0.67	0.66
393715095	TUBA1A/B/C	tubulin alpha-1A/B/C chain [Homo sapiens]									4	5															0.33	0.33
645912972	TUBB	tubulin beta chain [Homo sapiens]									4	7															0.33	0.33
29788768	TUBB2B	tubulin beta-2B chain [Homo sapiens]									4	7															0.33	0.33
530421543	UBA1	ubiquitin-like modifier-activating enzyme 1 [Homo sapiens]									2	2															0.33	0.33
601984520	UBC	polyubiquitin-C [Homo sapiens]					3	10																	3	5	0	0	0	0
6005942	VCP	transitional endoplasmic reticulum ATPase [Homo sapiens]					2	2			3	3															0.28	0.33
578818565	VIM	vimentin [Homo sapiens]									3	6					2	4									0.42	0.42	0.33	0.42
7706501	WBP11	WW domain-binding protein 11 [Homo sapiens]									3	5					3	6									0.33	0.33	0.36	0.33
10863945	XRCC5	X-ray repair cross-complementing protein 5 [Homo sapiens]									2	2					6	10	4	8							0.33	0.33	0.89	0.95
4503841	XRCC6	X-ray repair cross-complementing protein 6 [Homo sapiens]									5	10	4	6	5	11	6	13	5	9							0.95	0.94	1	1
18860916	XRN2	5'-3' exoribonuclease 2 [Homo sapiens]									3	4															0.33	0.33
34098946	YBX1	nuclease-sensitive element-binding protein 1 [Homo sapiens]			8	16	10	29	14	63	14	64	10	37	12	57	15	67	12	64	5	10	6	16	4	15	0.64	0.98	0.59	0.67
4507949	YWHAB	14-3-3 protein beta/alpha [Homo sapiens]					2	4
5803225	YWHAE	14-3-3 protein epsilon [Homo sapiens]									2	2															0.33	0.33
5803227	YWHAQ	14-3-3 protein theta [Homo sapiens]									3	3															0.33	0.33
530416049	ZC3H4	zinc finger CCCH domain-containing protein 4 [Homo sapiens]							2	2	2	2															0.66	0.65
27477138	ZC3HAV1	zinc finger CCCH-type antiviral protein 1 [Homo sapiens]							8	13	6	9			2	4	6	14									0.67	0.67	0.67	0.67
34101286	ZFR	zinc finger RNA-binding protein [Homo sapiens]							4	8	4	9															0.67	0.67
6912440	ZNF346	zinc finger protein 346 [Homo sapiens]							2	2	4	7															0.66	0.66
90193619	ZNF384	zinc finger protein 384 [Homo sapiens]							2	4																	0.33	0.33
152963637	ZNF787	zinc finger protein 787 [Homo sapiens]							4	13	3	7					2	4									0.67	0.67	0.34	0.42
